# Supplementary material for: Loss of Fas apoptosis inhibitory molecule leads to spontaneous obesity and hepatosteatosis
Source: PubMed Central journal article supplement (PMC4849152; doi:10.1038/cddis.2016.12), 2016-02-11

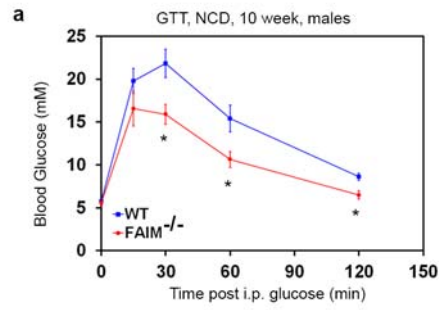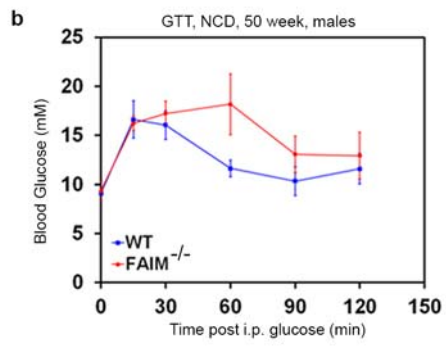

Supplement: cddis201612x2.pdf [file cddis201612x2.pdf]
