# Supplementary material for: Loss of Fas apoptosis inhibitory molecule leads to spontaneous obesity and hepatosteatosis
Source: PubMed Central journal article supplement (PMC4849152; doi:10.1038/cddis.2016.12), 2016-02-11
Supplement: cddis201612x5.pdf [file cddis201612x5.pdf]

**Supplementary Table 1. Association of FAIM expression with clinical and biochemical variables in multivariable linear regression model.**

| <b>Variables</b>              | <b>Unstandardized coefficients</b> | <b>Standardized coefficients</b> | <b>p value</b> |
|-------------------------------|------------------------------------|----------------------------------|----------------|
| <b>Age (years)</b>            | -0.003                             | -0.187                           | 0.102          |
| <b>Gender</b>                 | -0.123                             | -0.198                           | 0.071          |
| <b>BMI (kg/m<sup>2</sup>)</b> | -0.025                             | -0.477                           | <b>0.002</b>   |
| <b>HOMA-IR</b>                | -0.049                             | -0.337                           | <b>0.019</b>   |
| <b>Triglycerides (mM)</b>     | 0.035                              | 0.148                            | 0.205          |
| <b>HDL-Cholestrol (mM)</b>    | 0.089                              | 0.082                            | 0.477          |
| <b>LDL-Cholestrol (mM)</b>    | 0.058                              | 0.152                            | 0.284          |
