# Supplementary material for: Loss of Fas apoptosis inhibitory molecule leads to spontaneous obesity and hepatosteatosis
Source: PubMed Central journal article supplement (PMC4849152; doi:10.1038/cddis.2016.12), 2016-02-11
Supplement: cddis201612x6.pdf [file cddis201612x6.pdf]

**Supplementary Table 2. RT-PCR primers applied in the study**

| <b>Gene</b>                   | <b>Sequences of forward and reverse primers</b> | <b>Ref.</b>  |
|-------------------------------|-------------------------------------------------|--------------|
| GAPDH                         | TGTGTCCGTCGTGGATCTGA                            | 46           |
|                               | CCTGCTTCACCACCTTCTTGAT                          |              |
| SREBP-1a                      | GGCCGAGATGTGCGAACT                              | 46           |
|                               | TTGTTGATGAGCTGGAGCATGT                          |              |
| SREBP-1c                      | GGAGCCATGGATTGCACATT                            | 46           |
|                               | GGCCCGGGAAGTCACTGT                              |              |
| SREBP-2                       | GCGTTCTGGAGACCATGGA                             | 46           |
|                               | ACAAAGTTGCTCTGAAAACAAATCA                       |              |
| HMG CoA synthase              | GCCGTGAACTGGGTGCGAA                             | 46           |
|                               | GCATATATAGCAATGTCTCCTGCAA                       |              |
| HMG CoA reductase             | CTTGTGGAATGCCTTGTGATTG                          | 46           |
|                               | AGCCGAAGCAGCACATGAT                             |              |
| Farnesyl diphosphate synthase | ATGGAGATGGGCGAGTTCTTC                           | 46           |
|                               | CCGACCTTTCCCGTCACA                              |              |
| Squalene synthase             | CCAACTCAATGGGTCTGTTCCCT                         | 46           |
|                               | TGGCTTAGCAAAGTCTTCCAAC                          |              |
| LDL receptor                  | AGGCTGTGGGCTCCATAGG                             | 46           |
|                               | TGCGGTCCAGGGTCATCT                              |              |
| Acetyl CoA carboxylase        | TGACAGACTGATCGCAGAGAAAG                         | 46           |
|                               | TGGAGAGCCCCACACACA                              |              |
| Fatty acid synthase           | GCTGCGGAAACTTCAGGAAAT                           | 46           |
|                               | AGAGACGTGTCACTCCTGGACTT                         |              |
| Stearoyl CoA desaturase-1     | CCGGAGACCCCTTAGATCGA                            | 46           |
|                               | TAGCCTGTAAAAGATTTCTGCAAACC                      |              |
| ApoB                          | CGTGGGCTCCAGCATTCTA                             | 46           |
|                               | TCACCAGTCATTTCTGCCTTTG                          |              |
| ApoE                          | GCTGGGTGCAGACGCTTT                              | 46           |
|                               | TGCCGTCAGTTCTTGTGTGACT                          |              |
| FAIM                          | GCTATGGACGTATGGTGCAATGGT                        | NM_001033030 |
|                               | ACAGTCATGGTTCCCGATACTGAAG                       |              |
| $\beta$ -Actin                | ACGTGGACATCCGCAAAG                              | M28424.1     |
|                               | GACTCGTCATACTCCTGCTTG                           |              |
